# Supplementary material
Source: HighWire-hosted journal article supplement (https://srh.bmj.com/content/bmjsrh-2021-201281)
Supplement: inline-supplementary-material-1 [file inline-supplementary-material-1.pdf]

**Supplementary Table 1: Current pregnancy – teenagers vs. all other age groups**

|                                                            | Teenagers (n=61) | Not Teenagers (n=717) | P Value       |
|------------------------------------------------------------|------------------|-----------------------|---------------|
|                                                            | % (n)            |                       |               |
| <b>Gest. Age</b>                                           |                  |                       |               |
| < 7 weeks                                                  | 14.8% (9)        | 33% (236)             | <b>0.003</b>  |
| 7-10 weeks                                                 | 85.2% (52)       | 67% (481)             |               |
| <b>Ultrasound</b>                                          |                  |                       |               |
| Yes                                                        | 13.1% (8)        | 25.7% (184)           | <b>0.029</b>  |
| No                                                         | 86.9% (53)       | 74.3% (533)           |               |
| <b>Access to hospital</b>                                  |                  |                       |               |
| Yes                                                        | 70.5% (43)       | 87.4% (627)           | <b>0.0001</b> |
| No                                                         | 29.5% (18)       | 12.6% (90)            |               |
| <b>Blood type knowledge</b>                                |                  |                       |               |
| Yes                                                        | 39.3% (24)       | 73.4% (526)           | <b>0.0001</b> |
| No                                                         | 60.7% (37)       | 26.6% (191)           |               |
| <b>Pregnancy test</b>                                      |                  |                       |               |
| No, but I did an ultrasound and I am pregnant              | 0% (0)           | 4.9% (35)             | 0.102         |
| No, I did not do a pregnancy test                          | 21.3% (13)       | 4.9% (35)             | <b>0.0001</b> |
| Yes, and I am pregnant                                     | 78.7% (48)       | 90.2% (647)           | <b>0.005</b>  |
| <b>Cause of Pregnancy</b>                                  |                  |                       |               |
| I did not use contraceptives                               | 35% (21)         | 53.7% (379)           | <b>0.006</b>  |
| I wanted a pregnancy at first but my situation changed     | 0% (0)           | 0.3% (2)              | 1             |
| I was raped                                                | 10% (6)          | 2.8% (20)             | <b>0.003</b>  |
| The contraceptives I used did not work                     | 55% (33)         | 43.2% (305)           | 0.08          |
| <b>Reason for Abortion<br/>(multiple answers accepted)</b> |                  |                       |               |
| I have no money to raise a child                           | 50.8% (31)       | 34% (265)             | <b>0.032</b>  |
| I want to finish school                                    | 78.7% (48)       | 8.1% (58)             | <b>0.0001</b> |
| I am too young                                             | 85.2% (52)       | 11.7% (84)            | <b>0.0001</b> |
| I just cannot have a child at this point in my life        | 57.4% (35)       | 65.8% (472)           | 0.183         |
| I am ill                                                   | 0% (0)           | 0.7% (5)              | 1             |
| I am too old                                               | 0% (0)           | 4.6% (33)             | 0.101         |
| My family is complete                                      | 0% (0)           | 19.9% (143)           | <b>0.0001</b> |
| My partner does not want a child                           | 0% (0)           | 1.1% (8)              | 1             |
| <b>Company during abortion</b>                             |                  |                       |               |
| Yes                                                        | 95.1% (58)       | 92.6% (664)           | 0.612         |
| No                                                         | 4.9% (3)         | 7.4% (53)             |               |
| <b>Request status</b>                                      |                  |                       |               |
| Cancelled                                                  | 90.2% (55)       | 66.5% (477)           | <b>0.006</b>  |
| Delivered                                                  | 9.8% (6)         | 33.5% (240)           |               |
